# Supplementary material for: Backyard Biomes: Is Anyone There? Improving Public Awareness of Urban Wildlife Activity
Source: MDPI journal article supplement (doi:10.3390/d14040263), 2022-03-30
Supplement: s1 [file s1]

## Supplementary Materials

**Supplementary Table S1:** Summary of the animals captured on remote sensor camera traps in the backyards of householders who volunteered for the camera survey, across day and night. The number of animals represents the number of occurrences observed, multiple images for a single occurrence were removed for analyses. Garden type categories range from less modified to the most, being: semi-natural, modified-natural, semi-modified, modified, and very-modified. Species observed were: brown antechinus - *Antechinus stuartii* (antechinus); northern brown bandicoot - *Isodon macrourus* (bandicoot); common brushtail possum – *Trichosurus vulpecula* (brushtail); buff banded rail – *Gallirallus philippensis*, bush turkey – *Alectura lathemi*, crested pigeon – *Ocyphaps lophotes*, laughing kookaburra – *Dacelo novaeguineae*, Australian magpie – *Gymnorhina tibicen*, noisy miner – *Manorina melanocephala* (all grouped together as ‘native bird’); black rat – *Rattus rattus* and brown rat – *R. norvegicus* (grouped together as ‘introduced rat’); domestic dog – *Canis familiaris* (dog); domestic cat – *Felis catus* (cat); and red fox – *Vulpes vulpes* (fox).

| Location | Animal         | Number of Each Animal | Total Number of Animals | Garden type      |
|----------|----------------|-----------------------|-------------------------|------------------|
| 1        | cat            | 6                     | 9                       | modified         |
| 1        | antechinus     | 1                     | 9                       | modified         |
| 1        | dog            | 2                     | 9                       | modified         |
| 2        | introduced rat | 2                     | 2                       | very-modified    |
| 3        | antechinus     | 2                     | 12                      | very-modified    |
| 3        | brushtail      | 9                     | 12                      | very-modified    |
| 3        | native bird    | 1                     | 12                      | very-modified    |
| 4        | dog            | 3                     | 3                       | semi-modified    |
| 5        | brushtail      | 3                     | 7                       | modified-natural |
| 5        | introduced rat | 3                     | 7                       | modified-natural |
| 5        | native bird    | 1                     | 7                       | modified-natural |
| 6        | cat            | 1                     | 29                      | very-modified    |
| 6        | brushtail      | 10                    | 29                      | very-modified    |
| 6        | dog            | 17                    | 29                      | very-modified    |
| 6        | native bird    | 1                     | 29                      | very-modified    |
| 7        | brushtail      | 3                     | 8                       | modified         |
| 7        | dog            | 3                     | 8                       | modified         |
| 7        | introduced rat | 2                     | 8                       | modified         |
| 8        | antechinus     | 37                    | 49                      | semi-modified    |
| 8        | brushtail      | 4                     | 49                      | semi-modified    |
| 8        | native bird    | 8                     | 49                      | semi-modified    |
| 9        | antechinus     | 1                     | 15                      | very-modified    |
| 9        | brushtail      | 1                     | 15                      | very-modified    |
| 9        | dog            | 8                     | 15                      | very-modified    |
| 9        | introduced rat | 5                     | 15                      | very-modified    |
| 10       | cat            | 1                     | 33                      | semi-modified    |
| 10       | bandicoot      | 14                    | 33                      | semi-modified    |
| 10       | brushtail      | 1                     | 33                      | semi-modified    |

|    |                |    |    |               |
|----|----------------|----|----|---------------|
| 10 | introduced rat | 14 | 33 | semi-modified |
| 10 | native bird    | 3  | 33 | semi-modified |
| 11 | cat            | 1  | 16 | modified      |
| 11 | antechinus     | 1  | 16 | modified      |
| 11 | brushtail      | 4  | 16 | modified      |
| 11 | dog            | 6  | 16 | modified      |
| 11 | native bird    | 4  | 16 | modified      |
| 12 | cat            | 1  | 2  | very-modified |
| 12 | introduced rat | 1  | 2  | very-modified |
| 13 | brushtail      | 32 | 32 | semi-modified |
| 14 | native bird    | 2  | 2  | very-modified |
| 15 | fox            | 1  | 26 | semi-natural  |
| 15 | brushtail      | 15 | 26 | semi-natural  |
| 15 | introduced rat | 1  | 26 | semi-natural  |
| 15 | native bird    | 9  | 26 | semi-natural  |
| 16 | cat            | 3  | 32 | very-modified |
| 16 | brushtail      | 11 | 32 | very-modified |
| 16 | introduced rat | 18 | 32 | very-modified |
| 17 | brushtail      | 1  | 33 | semi-modified |
| 17 | dog            | 21 | 33 | semi-modified |
| 17 | introduced rat | 10 | 33 | semi-modified |
| 17 | native bird    | 1  | 33 | semi-modified |
| 18 | dog            | 9  | 11 | modified      |
| 18 | introduced rat | 2  | 11 | modified      |
| 19 | dog            | 6  | 7  | modified      |
| 19 | native bird    | 1  | 7  | modified      |
| 20 | cat            | 1  | 3  | modified      |
| 20 | brushtail      | 1  | 3  | modified      |
| 20 | introduced rat | 1  | 3  | modified      |
| 21 | introduced rat | 1  | 2  | very-modified |
| 21 | native bird    | 1  | 2  | very-modified |

---

**Supplementary Information:** The University of Sydney Human Ethics approved written survey questions that were distributed to 400 households.

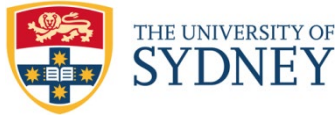

Discipline of Biology  
School of Life and Environmental Sciences  
Faculty of Science

## Questions for urban residents near bushlands

PLEASE NOTE THIS IS A CONFIDENTIAL SURVEY; YOUR IDENTITY WILL NOT BE RELATED TO THE ANSWERS

1. Do you have domestic pets / livestock / poultry? Y      N
2. What are they, and how many? .....  
.....  
.....
3. Do they have access to your yard? Y      N
4. How frequently? .....
5. Are they allowed to roam freely off your property? Y      N
6. How would you describe your yard (e.g. open grass area, vegetable garden, several small trees, shrubs, garden bed, raised garden bed, shed... etc.)?  
.....  
.....  
.....  
.....
7. How often do you water your yard? .....
8. Is there a constant water source in your yard (e.g. bowl, bird bath)? Y      N
9. Do you apply any fertilisers or otherwise to your yard? Y      N
10. What are they, and how frequently? .....  
.....

11. Do you apply any pesticides or otherwise to your yard (including cockroach or ant sprays, and natural remedies such as salt, soap, or vinegar)? Y N

12. What are they, and how frequently? .....

13. Do you have a light that shines on to your yard at night? Y N

14. How frequently, and what wattage? .....

15. Do you think that noise from your regular activities can be heard in your yard, please indicate the type of noise being made, how frequently it is made, and how loud it appears to you (e.g. music from stereo in house daily in mornings – heard outside at a moderate level that could easily be talked over).

.....

.....

16. Do you know how long your current fence has been there? .....

17. Do you know what it is made of? .....

18. Does it go to ground level or below, or have a gap? .....

19. Have you noticed any wildlife activity or signs of it (like diggings / holes) in your yard, please detail what and how frequently.

.....

.....

.....

.....

20. Do you use the near-by bushland, State Conservation Areas and / or Nature Reserves? If so, please indicate which areas, how often, and what activities you undertake there (e.g. cycling, running, walking, dog walking, horse riding, animal observations).

.....

.....

.....

.....
