# Supplementary material for: Backyard Biomes: Is Anyone There? Improving Public Awareness of Urban Wildlife Activity
Source: MDPI journal article supplement (doi:10.3390/d14040263), 2022-03-30
Supplement: s1 [file s1]

Archive with 1 entries (1 files):
- diversity-1643250-supplementary.pdf
